# Supplementary material
Source: ML conference proceedings conference paper supplement (https://openreview.net/forum?id=8e5SJJ1cjY)
Supplement: supplementary_material [file SegGraph_Supplementary.pdf › Technical_Appendices_and_Supplementary_Material/SegGraph_Supplementary.pdf]

## A Implementation Details

Experiments on PartNet-E follow the rendering protocol and training-testing splits used in PartSLIP, where we render point clouds into  $800 \times 800$  resolution images from 10 selected views. Then we utilize a  $64 \times 64$  grid of point prompts in SAM to generate segment masks. For ShapeNetPart, we follow the approach of PointCLIPv2, projecting point clouds into  $224 \times 224$  resolution images and using a  $16 \times 16$  grid of points as prompts for SAM to produce masks. Since there is no official few-shot split provided for ShapeNetPart, we randomly sample 8 instances per category from the training set as the few-shot training data. We adopt the method from 3-by-2 to further subdivide the overlapping regions among SAM-generated masks, ensuring that all masks are mutually non-overlapping.

For the training on PartNet-E, we used the Adam optimizer with a learning rate of 0.001 and a weight decay of 0.01. A StepLR scheduler was applied with a step size of 5 and a gamma of 0.9. Each category in PartNet-E was trained for 20 epochs. For ShapeNetPart, we also used the Adam optimizer, with a learning rate of 0.01 and no weight decay. A StepLR scheduler with a step size of 5 and gamma of 0.9 was used as well. Each category in ShapeNetPart was trained for 30 epochs. All experiments are conducted on a single NVIDIA V100 GPU. We will release the code for a reference of implementation details.

## B Per-category Results for Comparisons and Ablations

The complete comparison results of the proposed method SegGraph and the baselines across all 45 categories on the PartNet-E dataset are presented in Tab. A1.

Table A1: Few-shot part segmentation results on PartNet-E

| Categories        | few-shot w/ additional data (45x8+28k) |           |           | few-shot (45x8) |            |          |             |        |      |       |
|-------------------|----------------------------------------|-----------|-----------|-----------------|------------|----------|-------------|--------|------|-------|
|                   | PointNet++                             | SoftGroup | PointNext | PartSLIP        | PartSLIP++ | PartSTAD | PartDistill | 3-By-2 | Ours | (std) |
| Bottle            | 48.8                                   | 41.4      | 68.4      | 83.4            | 85.5       | 83.6     | 84.6        | 80.9   | 90.0 | 0.7   |
| Box               | 18.6                                   | 8.8       | 84.2      | 84.5            | 85.5       | 81.1     | 87.9        | 76.1   | 87.9 | 0.6   |
| Bucket            | 0.0                                    | 25.0      | 4.1       | 36.5            | 85.5       | 83.6     | 50.7        | 78.4   | 85.6 | 2.2   |
| Camera            | 6.5                                    | 23.6      | 33.2      | 58.3            | 63.2       | 64.4     | 60.1        | 62.6   | 70.8 | 1.0   |
| Cart              | 6.4                                    | 23.9      | 36.3      | 88.1            | 84.9       | 85.0     | 90.1        | 81.2   | 87.1 | 0.3   |
| Chair             | 84.7                                   | 88.3      | 91.8      | 85.3            | 85.3       | 85.3     | 88.4        | 84.4   | 89.5 | 0.4   |
| Clock             | 19.2                                   | 2.5       | 28.4      | 37.6            | 54.1       | 47.4     | 37.2        | 45.8   | 49.8 | 3.1   |
| Coffee machine    | 34.6                                   | 8.3       | 17.9      | 37.8            | 37.6       | 35.8     | 40.2        | 34.2   | 41.7 | 1.2   |
| Dishwasher        | 49.5                                   | 53.0      | 69.2      | 62.5            | 60.9       | 60.6     | 60.2        | 53.6   | 63.1 | 0.9   |
| Dispenser         | 12.1                                   | 18.9      | 26.0      | 73.8            | 72.0       | 73.7     | 74.7        | 78.2   | 77.6 | 0.4   |
| Display           | 78.3                                   | 62.1      | 89.4      | 84.8            | 85.1       | 82.3     | 87.4        | 72.6   | 81.9 | 0.1   |
| Door              | 45.7                                   | 53.1      | 43.8      | 40.8            | 45.1       | 61.4     | 55.5        | 54.4   | 73.6 | 0.2   |
| Eyeglasses        | 76.2                                   | 72.4      | 88.1      | 88.3            | 88.3       | 92.5     | 91.1        | 92.8   | 97.0 | 0.4   |
| Faucet            | 67.2                                   | 68.4      | 85.0      | 71.4            | 65.9       | 65.3     | 73.5        | 66.9   | 68.4 | 0.6   |
| Folding chair     | 10.9                                   | 14.7      | 96.4      | 86.3            | 89.9       | 91.6     | 90.7        | 93.6   | 94.7 | 0.1   |
| Globe             | 46.5                                   | 59.0      | 92.3      | 95.7            | 92.8       | 93.5     | 97.4        | 95.2   | 98.4 | 0.3   |
| Kettle            | 20.9                                   | 57.4      | 45.1      | 77.0            | 85.6       | 84.2     | 78.6        | 81.5   | 87.8 | 0.5   |
| Keyboard          | 74.5                                   | 58.9      | 45.0      | 53.6            | 72.4       | 82.4     | 70.8        | 89.6   | 88.7 | 0.0   |
| Kitchenpot        | 15.8                                   | 45.5      | 57.0      | 69.6            | 72.9       | 73.5     | 69.7        | 65.0   | 85.2 | 0.7   |
| Knife             | 35.4                                   | 31.3      | 58.7      | 65.2            | 64.3       | 63.8     | 71.4        | 75.1   | 77.3 | 0.1   |
| Lamp              | 68.0                                   | 82.2      | 64.9      | 66.1            | 68.0       | 68.4     | 69.2        | 59.5   | 78.5 | 0.7   |
| Laptop            | 55.4                                   | 18.4      | 32.5      | 29.7            | 29.7       | 34.6     | 40.0        | 45.3   | 58.8 | 0.5   |
| Lighter           | 35.0                                   | 30.2      | 16.3      | 64.7            | 66.2       | 65.9     | 64.9        | 65.0   | 64.5 | 0.4   |
| Microwave         | 43.6                                   | 38.3      | 40.5      | 42.7            | 49.5       | 59.1     | 43.8        | 40.2   | 59.4 | 2.4   |
| Mouse             | 16.7                                   | 55.9      | 32.5      | 44.0            | 58.7       | 48.9     | 46.9        | 68.4   | 46.9 | 1.3   |
| Oven              | 34.4                                   | 13.7      | 37.8      | 73.5            | 70.3       | 71.9     | 72.8        | 60.0   | 75.7 | 1.3   |
| Pen               | 46.5                                   | 28.9      | 39.5      | 71.5            | 66.4       | 60.6     | 74.4        | 62.8   | 70.4 | 1.0   |
| Phone             | 20.0                                   | 2.4       | 39.5      | 48.4            | 59.0       | 63.2     | 50.8        | 41.0   | 59.2 | 2.7   |
| Pliers            | 57.7                                   | 74.2      | 99.6      | 33.2            | 29.7       | 99.3     | 90.4        | 99.4   | 99.6 | 0.0   |
| Printer           | 0.0                                    | 1.2       | 0.0       | 4.3             | 6.2        | 7.9      | 6.3         | 8.5    | 27.1 | 2.1   |
| Refrigerator      | 43.4                                   | 46.9      | 76.2      | 55.8            | 55.7       | 53.6     | 58.1        | 51.7   | 59.1 | 2.3   |
| Remote            | 3.6                                    | 37.1      | 57.8      | 38.3            | 36.4       | 53.4     | 40.7        | 54.1   | 83.5 | 0.8   |
| Safe              | 31.9                                   | 5.3       | 25.6      | 32.2            | 37.2       | 36.8     | 58.6        | 34.7   | 66.1 | 1.4   |
| Scissors          | 50.0                                   | 76.0      | 57.3      | 60.3            | 60.5       | 68.5     | 68.8        | 65.7   | 75.2 | 0.6   |
| Stapler           | 51.6                                   | 80.1      | 88.6      | 84.8            | 63.0       | 85.8     | 86.3        | 90.1   | 95.1 | 0.3   |
| Storage furniture | 46.9                                   | 60.2      | 68.5      | 53.6            | 57.3       | 59.5     | 56.5        | 51.7   | 60.1 | 0.4   |
| Suitcase          | 40.7                                   | 18.3      | 13.6      | 70.4            | 70.0       | 68.3     | 73.4        | 65.2   | 77.3 | 1.3   |
| Switch            | 1.8                                    | 21.0      | 39.7      | 59.4            | 56.1       | 57.9     | 60.7        | 54.6   | 76.1 | 1.2   |
| Table             | 57.7                                   | 59.1      | 61.6      | 42.5            | 52.1       | 47.8     | 63.3        | 56.6   | 63.9 | 0.3   |
| Toaster           | 14.7                                   | 26.4      | 8.4       | 60.0            | 50.8       | 58.6     | 58.7        | 56.5   | 66.1 | 6.2   |
| Toilet            | 18.0                                   | 18.0      | 16.5      | 53.8            | 70.5       | 57.5     | 55.0        | 56.9   | 59.4 | 3.7   |

Table A1 – continued from previous page

| Categories      | few-shot w/ additional data (45x8+28k) |           |           | few-shot (45x8) |            |          |             |        |      |       |
|-----------------|----------------------------------------|-----------|-----------|-----------------|------------|----------|-------------|--------|------|-------|
|                 | PointNet++                             | SoftGroup | PointNext | PartSLIP        | PartSLIP++ | PartSTAD | PartDistill | 3-By-2 | Ours | (std) |
| Trash can       | 71.7                                   | 17.0      | 22.8      | 22.3            | 24.2       | 21.2     | 70.0        | 33.1   | 55.3 | 1.1   |
| USB             | 52.4                                   | 44.1      | 67.9      | 54.4            | 57.5       | 59.9     | 64.3        | 79.0   | 63.8 | 1.8   |
| Washing machine | 0.6                                    | 24.1      | 27.3      | 53.5            | 48.7       | 48.2     | 55.1        | 52.6   | 55.6 | 0.9   |
| Window          | 26.3                                   | 39.2      | 83.3      | 75.4            | 72.8       | 76.1     | 78.1        | 73.9   | 84.3 | 0.8   |
| Overall         | 36.5                                   | 38.5      | 50.6      | 59.4            | 62.1       | 65.0     | 65.9        | 64.2   | 72.8 | 1.1   |

Table A2: Ablation study of each module on PartNet-E

|                   | Base |     | AVE  |     | SE & eq(2) |     | graph |     | SE & eq(2) & graph |     |
|-------------------|------|-----|------|-----|------------|-----|-------|-----|--------------------|-----|
|                   | mIoU | std | mIoU | std | mIoU       | std | mIoU  | std | mIoU               | std |
| Bottle            | 83.4 | 0.3 | 89.0 | 0.8 | 87.9       | 1.9 | 87.8  | 1.2 | 90.0               | 2.7 |
| Box               | 84.2 | 0.3 | 84.9 | 3.8 | 90.4       | 3.9 | 87.7  | 1.5 | 87.9               | 1.2 |
| Bucket            | 75.3 | 0.5 | 77.0 | 5.4 | 79.1       | 5.5 | 81.7  | 1.0 | 85.6               | 0.5 |
| Camera            | 58.8 | 0.1 | 70.1 | 0.5 | 69.4       | 1.5 | 68.1  | 0.6 | 70.8               | 0.7 |
| Cart              | 78.1 | 0.2 | 86.7 | 2.9 | 88.7       | 0.4 | 87.1  | 0.0 | 87.1               | 0.3 |
| Chair             | 86.1 | 0.1 | 88.1 | 1.3 | 89.0       | 0.3 | 90.1  | 0.1 | 89.5               | 2.3 |
| Clock             | 22.7 | 1.0 | 46.6 | 5.0 | 32.8       | 5.1 | 43.9  | 1.9 | 49.8               | 0.6 |
| CoffeeMachine     | 36.1 | 0.2 | 32.2 | 1.0 | 35.0       | 3.8 | 41.8  | 1.0 | 41.7               | 2.2 |
| Dishwasher        | 58.8 | 0.2 | 61.5 | 2.1 | 61.5       | 1.1 | 62.8  | 0.5 | 63.1               | 1.0 |
| Dispenser         | 69.8 | 0.5 | 77.2 | 0.4 | 79.6       | 1.5 | 78.2  | 2.0 | 77.6               | 0.4 |
| Display           | 75.9 | 0.3 | 81.4 | 1.8 | 82.9       | 0.3 | 81.9  | 0.5 | 81.9               | 3.1 |
| Door              | 62.3 | 0.2 | 72.7 | 0.2 | 72.3       | 1.5 | 70.5  | 1.0 | 73.6               | 0.9 |
| Eyeglasses        | 90.8 | 0.4 | 94.8 | 0.5 | 94.2       | 0.4 | 95.9  | 0.7 | 97.0               | 0.4 |
| Faucet            | 64.6 | 0.7 | 69.5 | 1.4 | 70.2       | 1.0 | 68.9  | 0.8 | 68.4               | 0.1 |
| FoldingChair      | 91.6 | 0.3 | 94.6 | 0.5 | 94.9       | 0.2 | 94.6  | 0.2 | 94.7               | 0.2 |
| Globe             | 96.5 | 0.4 | 98.4 | 0.5 | 98.2       | 0.2 | 98.4  | 0.0 | 98.4               | 0.4 |
| Kettle            | 80.2 | 0.2 | 87.2 | 0.3 | 87.3       | 0.6 | 85.9  | 0.2 | 87.8               | 0.6 |
| Keyboard          | 84.0 | 0.1 | 85.8 | 0.2 | 85.9       | 0.4 | 87.9  | 0.1 | 88.7               | 0.1 |
| KitchenPot        | 80.5 | 0.2 | 82.0 | 0.5 | 82.9       | 2.1 | 84.4  | 0.3 | 85.2               | 0.3 |
| Knife             | 71.5 | 0.6 | 78.9 | 1.1 | 77.0       | 2.3 | 76.6  | 1.0 | 77.3               | 0.5 |
| Lamp              | 71.9 | 0.1 | 79.9 | 2.0 | 79.9       | 0.3 | 77.6  | 0.6 | 78.5               | 0.0 |
| Laptop            | 54.8 | 0.5 | 54.3 | 0.7 | 55.7       | 0.8 | 57.6  | 1.3 | 58.8               | 0.7 |
| Lighter           | 57.9 | 0.5 | 64.7 | 0.5 | 63.8       | 2.2 | 65.7  | 1.8 | 64.5               | 0.1 |
| Microwave         | 50.0 | 0.6 | 58.6 | 2.3 | 60.3       | 3.4 | 56.1  | 2.7 | 59.4               | 0.7 |
| Mouse             | 31.4 | 0.2 | 42.9 | 0.4 | 42.9       | 0.7 | 43.0  | 0.9 | 46.9               | 0.4 |
| Oven              | 67.3 | 0.2 | 74.8 | 0.7 | 76.1       | 0.5 | 74.9  | 0.7 | 75.7               | 2.4 |
| Pen               | 64.1 | 0.3 | 71.9 | 1.9 | 74.6       | 1.9 | 68.3  | 1.0 | 70.4               | 1.3 |
| Phone             | 44.5 | 0.7 | 54.9 | 2.1 | 57.9       | 3.9 | 52.5  | 3.1 | 59.2               | 1.3 |
| Pliers            | 99.6 | 0.0 | 99.5 | 0.1 | 99.5       | 0.1 | 99.6  | 0.0 | 99.6               | 1.0 |
| Printer           | 20.5 | 0.4 | 20.4 | 5.6 | 19.7       | 6.4 | 23.8  | 0.8 | 27.1               | 0.0 |
| Refrigerator      | 53.6 | 0.3 | 62.6 | 0.5 | 62.5       | 0.7 | 59.6  | 0.4 | 59.1               | 2.1 |
| Remote            | 63.1 | 1.2 | 78.9 | 0.1 | 79.3       | 0.6 | 81.9  | 1.4 | 83.5               | 0.8 |
| Safe              | 59.4 | 0.5 | 59.5 | 2.3 | 62.0       | 1.3 | 63.7  | 0.9 | 66.1               | 1.4 |
| Scissors          | 69.4 | 0.4 | 73.6 | 1.4 | 74.1       | 0.6 | 73.2  | 1.2 | 75.2               | 0.6 |
| Stapler           | 90.2 | 0.3 | 94.3 | 0.3 | 93.8       | 1.1 | 94.1  | 0.9 | 95.1               | 0.3 |
| Storage furniture | 57.0 | 0.3 | 58.2 | 0.4 | 58.6       | 0.6 | 59.1  | 0.5 | 60.1               | 0.4 |
| Suitcase          | 70.1 | 0.4 | 70.5 | 2.8 | 66.9       | 5.4 | 73.0  | 0.9 | 77.3               | 1.3 |
| Switch            | 63.2 | 0.6 | 72.6 | 1.4 | 70.6       | 1.2 | 75.1  | 1.5 | 76.1               | 1.2 |
| Table             | 56.3 | 0.3 | 62.6 | 0.1 | 62.4       | 1.1 | 63.4  | 0.5 | 63.9               | 0.3 |
| Toaster           | 54.6 | 0.4 | 46.6 | 0.6 | 60.9       | 2.2 | 62.1  | 3.6 | 66.1               | 6.2 |
| Toilet            | 49.1 | 0.6 | 62.0 | 0.9 | 63.5       | 0.9 | 55.5  | 1.1 | 59.4               | 3.7 |
| TrashCan          | 50.9 | 0.7 | 55.5 | 0.6 | 54.8       | 1.0 | 53.5  | 0.6 | 55.3               | 1.1 |
| USB               | 54.7 | 0.8 | 64.0 | 0.6 | 63.8       | 0.2 | 60.2  | 1.0 | 63.8               | 1.8 |
| WashingMachine    | 47.6 | 0.4 | 51.2 | 0.9 | 52.2       | 3.2 | 57.2  | 1.2 | 55.6               | 0.9 |
| Window            | 84.6 | 0.1 | 79.7 | 0.3 | 79.2       | 0.9 | 85.2  | 0.1 | 84.3               | 0.8 |
| Overall           | 65.3 | 0.4 | 70.5 | 1.3 | 71.0       | 1.7 | 71.3  | 1.0 | 72.8               | 1.1 |

Tab. A2 presents the results of the ablation study on all 45 categories of the PartNet-E dataset. Here, Base denotes a baseline where the aggregated 3D features are directly segmented using a simple MLP. AVE replaces the SE module and the process in Eq. (2) with average pooling and average unpooling operations.

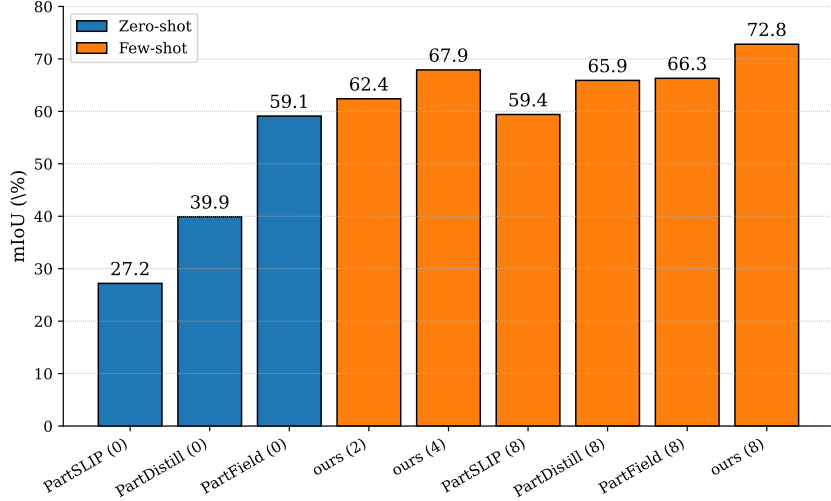

Figure A1: Evaluation under varying numbers of shots. We evaluated our method under different shot settings. In the figure, blue indicates zero-shot methods, while orange represents few-shot methods. The number in parentheses following each method name on the x-axis denotes the number of shots used during training.

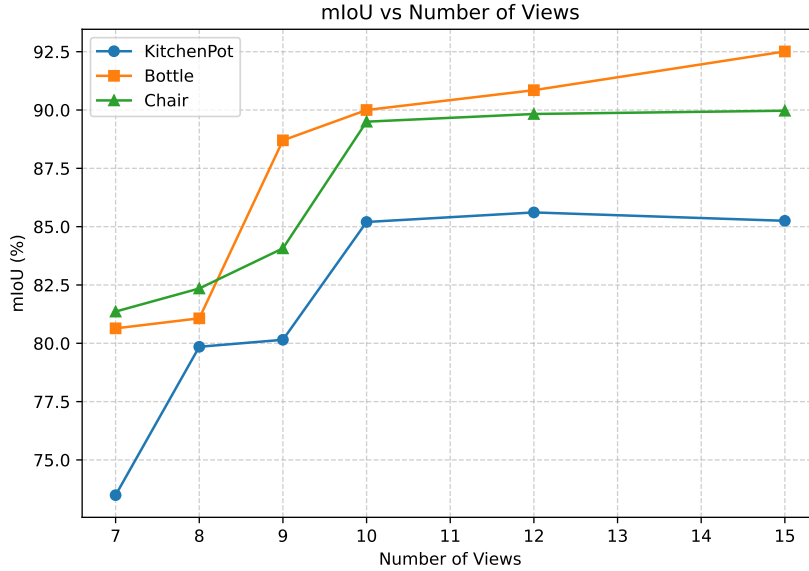

Figure A2: Evaluation under varying numbers of views.

## C HyperParameter Analysis

**The Number of Shots.** We evaluate the method using varying numbers of shots, with detailed results presented in Fig. A1. As shown in the figure, our method already outperforms PartField—which relies on knowledge distillation from large-scale 3D data—in the 2-shot setting. Remarkably, with only 4 shots, our method achieves superior performance compared to all prior methods even under the 8-shot setting.

**The Number of Views.** We conducted experiments on Kitchen Pot, Bottle, and Chair under different numbers of rendered views, as shown in Fig. A2. When the number of views exceeds 10, the performance improvement becomes marginal as more views are added. In contrast, when the number of views falls below 10, the model performance drops sharply, underscoring the critical role of sufficient multi-view information for ensuring the model’s effectiveness.

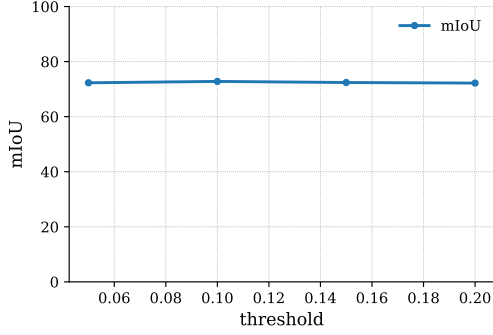

Figure A3: Effect of different overlap thresholds

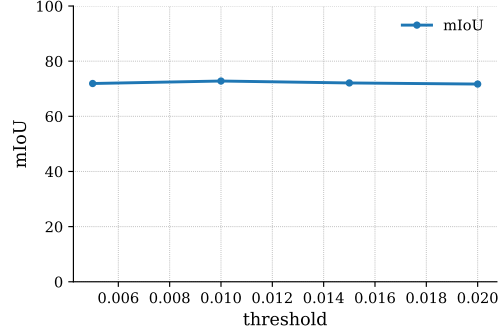

Figure A4: Effect of different adjacent thresholds

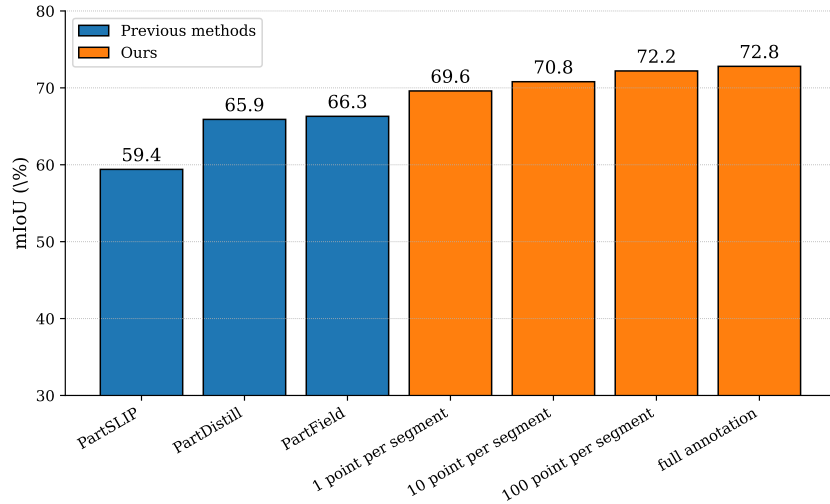

Figure A5: Evaluation under different numbers of annotation points. Under the 8-shot setting, we compared the label-efficient variants of our method with other methods trained using fully annotated data. In the figure, the blue bars represent the performance of methods trained with full labels under the 8-shot configuration, while the orange bars correspond to the performance of our method with varying numbers of labeled points.

**Overlap and Adjacency Thresholds.** When constructing the segment graph, we determine whether two segments from different viewpoints are overlapping based on the proportion of overlapping points between them, and whether this proportion exceeds a predefined threshold. We conduct experiments with different threshold values, as shown in Fig. A3. Results suggest that the model’s performance remains largely unaffected. We hypothesize that this robustness stems from the high precision of the segmentation produced by SAM, which allows accurate identification of overlapping relationships even when the threshold is set relatively low. Similarly, we conduct experiments with different minimum thresholds used to determine whether two segments are adjacent. As shown in Fig. A4, threshold variations within a reasonable range have no significant impact on the results. The above results were validated on the PartNet-E dataset.

**Results for Label Efficient Annotations.** Given that annotating 3D data is labor-intensive and challenging, we also explore applications in label-efficient learning. Leveraging the strong internal semantic consistency of segments obtained by SAM, we perform sparse annotations within each segment, randomly labeling 1, 10, or 100 points per segment. This evaluation was conducted on the PartNet-E dataset. As shown in Fig. A5, even when only a single point is annotated within each segment, our method still achieves state-of-the-art performance compared to previous few-shot approaches.

Table A3: Performance comparison on coarse- and fine-grained part segmentation on the 3DCom-PaT++ dataset.

| Method                 | Coarse   |         |       | Fine     |         |       |
|------------------------|----------|---------|-------|----------|---------|-------|
|                        | Airplane | Bicycle | Chair | Airplane | Bicycle | Chair |
| PartSLIP++ (zero-shot) | 11.56    | 60.52   | 16.59 | 9.48     | 2.60    | 4.87  |
| Ours (1-shot)          | 93.31    | 91.21   | 41.41 | 45.34    | 26.26   | 27.21 |
| Ours (8-shot)          | 94.64    | 95.46   | 69.26 | 65.38    | 54.17   | 42.61 |

## D Experiment on More Complex Datasets

Our method can be extended to multi-granularity once the annotation is available. For example, 3DComPat++ [A4] provides coarse-grained annotations (at most 5 part categories) and fine-grained annotations (10-20 part categories). We selected three categories—airplane, bicycle, and chair—for evaluation. Airplanes have 14 fine-grained and 3 coarse part labels; bicycles have 26 fine-grained ones and 3 coarse ones; chairs have 22 fine-grained labels and 4 coarse labels. We extend to multi-grained segmentation by tuning separate networks. In the Tab. A3, our method demonstrates significant advantages across different levels of part annotation granularity.

## E Robustness to Noise and Real-World Data

To assess the robustness of the proposed method to noisy real-world data, experiments were conducted by injecting Gaussian noise into the normalized point cloud space. As shown in Tab. A4. Specifically, noise with standard deviations of 0.005, 0.01, 0.02, 0.05 was added to evaluate the degradation trend in segmentation performance.

Table A4: Performance under different noise levels (mIoU, %).

| Category   | 0    | 0.005 | 0.01  | 0.02  | 0.05  |
|------------|------|-------|-------|-------|-------|
| KitchenPot | 85.2 | 81.83 | 80.29 | 75.01 | 66.68 |
| Bottle     | 90.0 | 83.98 | 78.99 | 74.88 | 69.04 |
| Chair      | 89.5 | 87.03 | 82.34 | 78.02 | 67.58 |

## F Comparison with Semantic Mask-Based Approaches

The comparison with representative semantic mask-based methods, including OpenMask3D [A5], SATR [A1], and Find3D [A2], is presented in Table A5. As shown, our method consistently achieves a significant performance advantage across all evaluation metrics. This improvement stems from two main factors. First, OpenMask3D relies on Mask3D [A3] as its 3D feature extractor, which is pre-trained on the indoor scene dataset ScanNet, leading to poor generalization to the more diverse and geometrically complex 3D shapes in PartNetE. Second, as highlighted in the Find3D paper, PartNetE poses substantial challenges due to numerous small parts with minimal geometric or color distinctiveness (e.g., buttons on uniformly colored surfaces), which degrades the performance of both Find3D and SATR. In contrast, our method excels in identifying and segmenting such small, indistinct components, which underscores its robustness in fine-grained part segmentation.

## G Graph Construction from Multi-View Segments

The graph in our framework is constructed directly from the segments generated by applying SAM to multi-view images. Each segment corresponds to a node, and edges are established based on adjacency and overlap relationships among these segments. To quantitatively analyze the graph scale, we report the average and maximum numbers of nodes, adjacent edges, and overlapping edges per object on the PartNet-E dataset in Table A6.

Table A5: Comparison with semantic mask-based approaches on PartNet-E.

| Setting   | Method         | mIoU (%)     |
|-----------|----------------|--------------|
| Zero-shot | OpenMask3D     | 12.54        |
|           | Find3D         | 16.38        |
|           | SATR           | 19.42        |
| Few-shot  | Ours (1-shot)  | 53.36        |
|           | Ours (8-shots) | <b>72.80</b> |

Table A6: Statistics of the constructed graphs on PartNet-E.

| Metric | Nodes  | Adjacent Edges | Overlapping Edges |
|--------|--------|----------------|-------------------|
| Mean   | 136.53 | 310.58         | 2386.84           |
| Max    | 1121   | 1872           | 21024             |

As shown in Table A6, the constructed graphs, with an average of a few hundred nodes and several thousand edges, are significantly smaller and more compact than the raw point clouds of each object in PartNet-E, which typically contain hundreds of thousands of points. This compact representation enables efficient structural reasoning without compromising geometric detail.

## H More Qualitative Results

In Figs. A6–A8, we present additional segmentation results on PartNet-E, focusing on categories that contain small parts, such as cameras and remote controls with button parts, doors with handle parts, and lamps with bulb parts. As illustrated in the figures, our method achieves higher accuracy in segmenting these fine-grained components.

## I More Results on Feature Similarity

In Figs. A9–A12, we present additional visualizations of feature similarity across different parts. For each shape, we select an anchor point (indicated by the red arrow in the first column) and compute the Euclidean distance between the anchor and all other points—both within the same shape (first column) and across different shapes (remaining columns). The distances are then normalized for visualization. Points with higher similarity (i.e., smaller distances) are shown in blue, while less similar points appear in gray. As illustrated in the results, features from the same part category exhibit strong consistency both within a single shape and across different shapes, whereas features from different part categories demonstrate clear dissimilarity.

## Appendix A References

- [A1] Ahmed Abdelreheem et al. “SATR: Zero-Shot Semantic Segmentation of 3D Shapes”. In: *IEEE/CVF International Conference on Computer Vision, ICCV 2023, Paris, France, October 1-6, 2023*. IEEE, 2023, pp. 15120–15133.
- [A2] Ziqi Ma, Yisong Yue, and Georgia Gkioxari. “Find Any Part in 3D”. In: *CoRR* abs/2411.13550 (2024).
- [A3] Jonas Schult et al. “Mask3D: Mask Transformer for 3D Semantic Instance Segmentation”. In: *IEEE International Conference on Robotics and Automation, ICRA 2023, London, UK, May 29 - June 2, 2023*. IEEE, 2023, pp. 8216–8223.
- [A4] Habib Slim et al. “3DCoMPaT<sup>++</sup>: An improved Large-scale 3D Vision Dataset for Compositional Recognition”. In: *CoRR* abs/2310.18511 (2023).
- [A5] Ayça Takmaz et al. “OpenMask3D: Open-Vocabulary 3D Instance Segmentation”. In: *Advances in Neural Information Processing Systems 36: Annual Conference on Neural Information Processing Systems*. Ed. by Alice Oh et al. 2023.

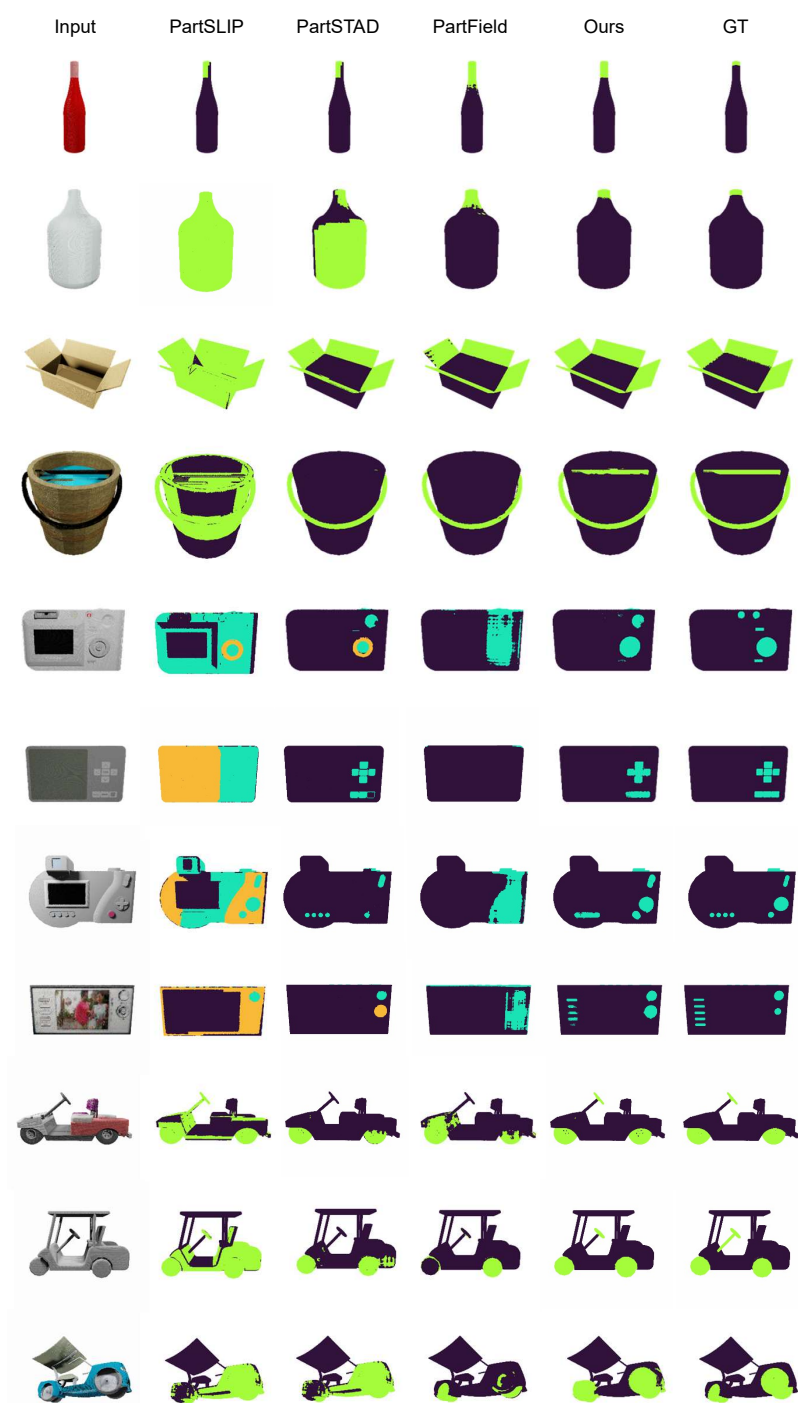

Figure A6: Qualitative comparison of part segmentation results

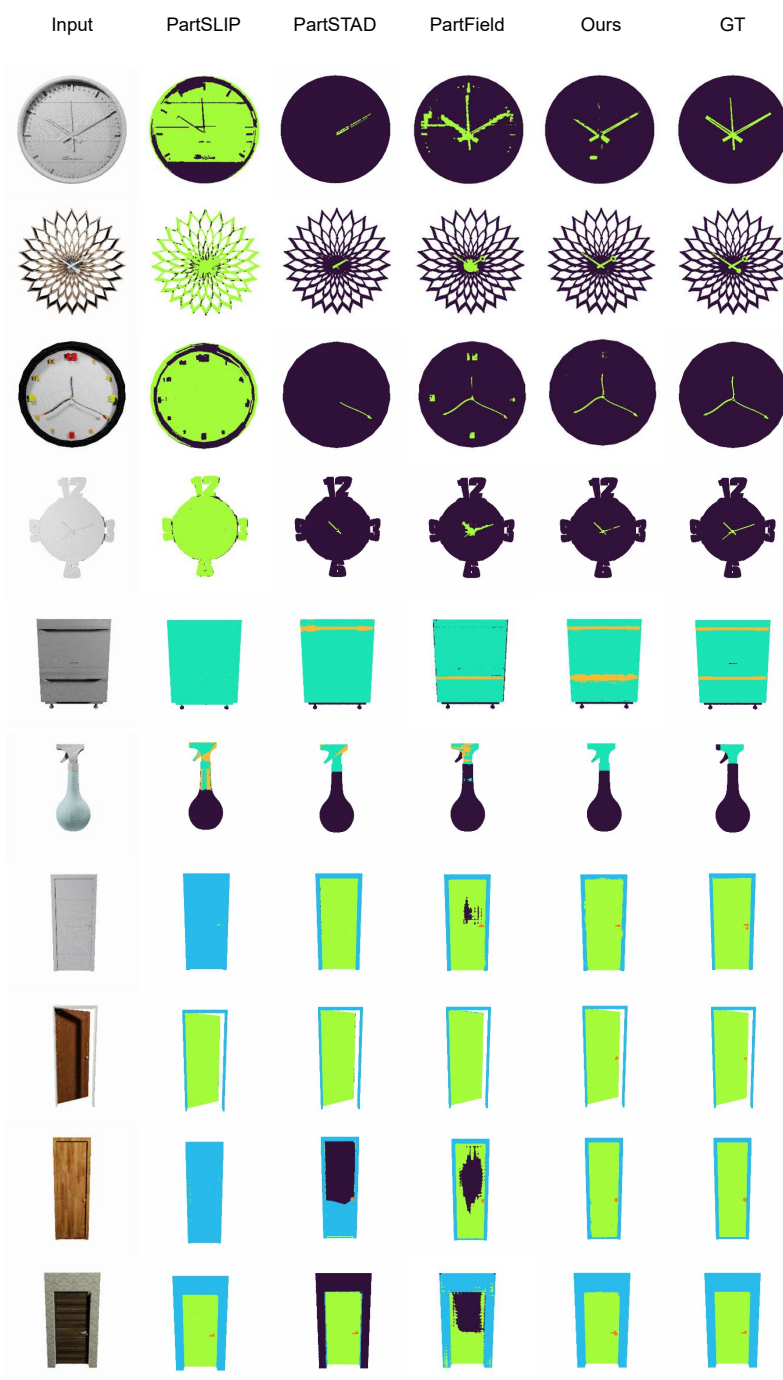



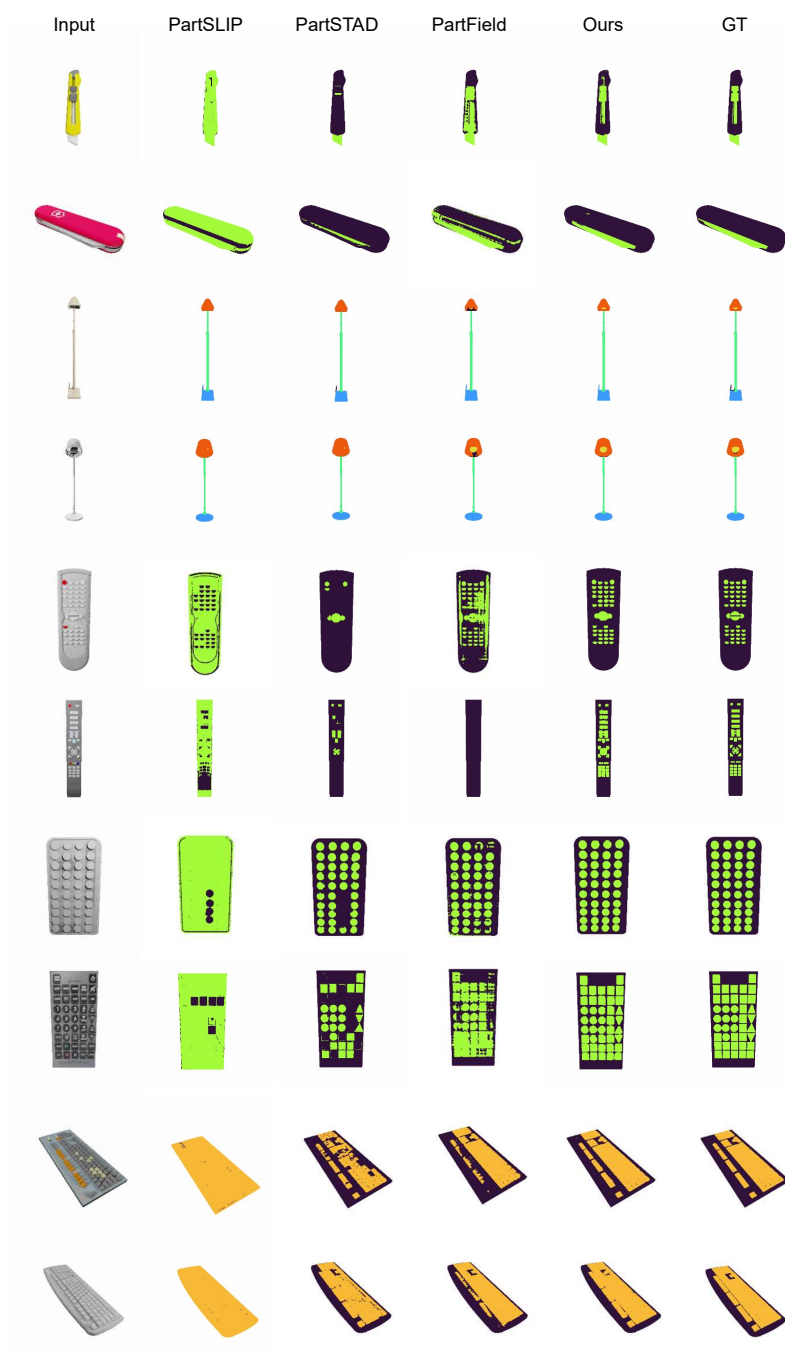

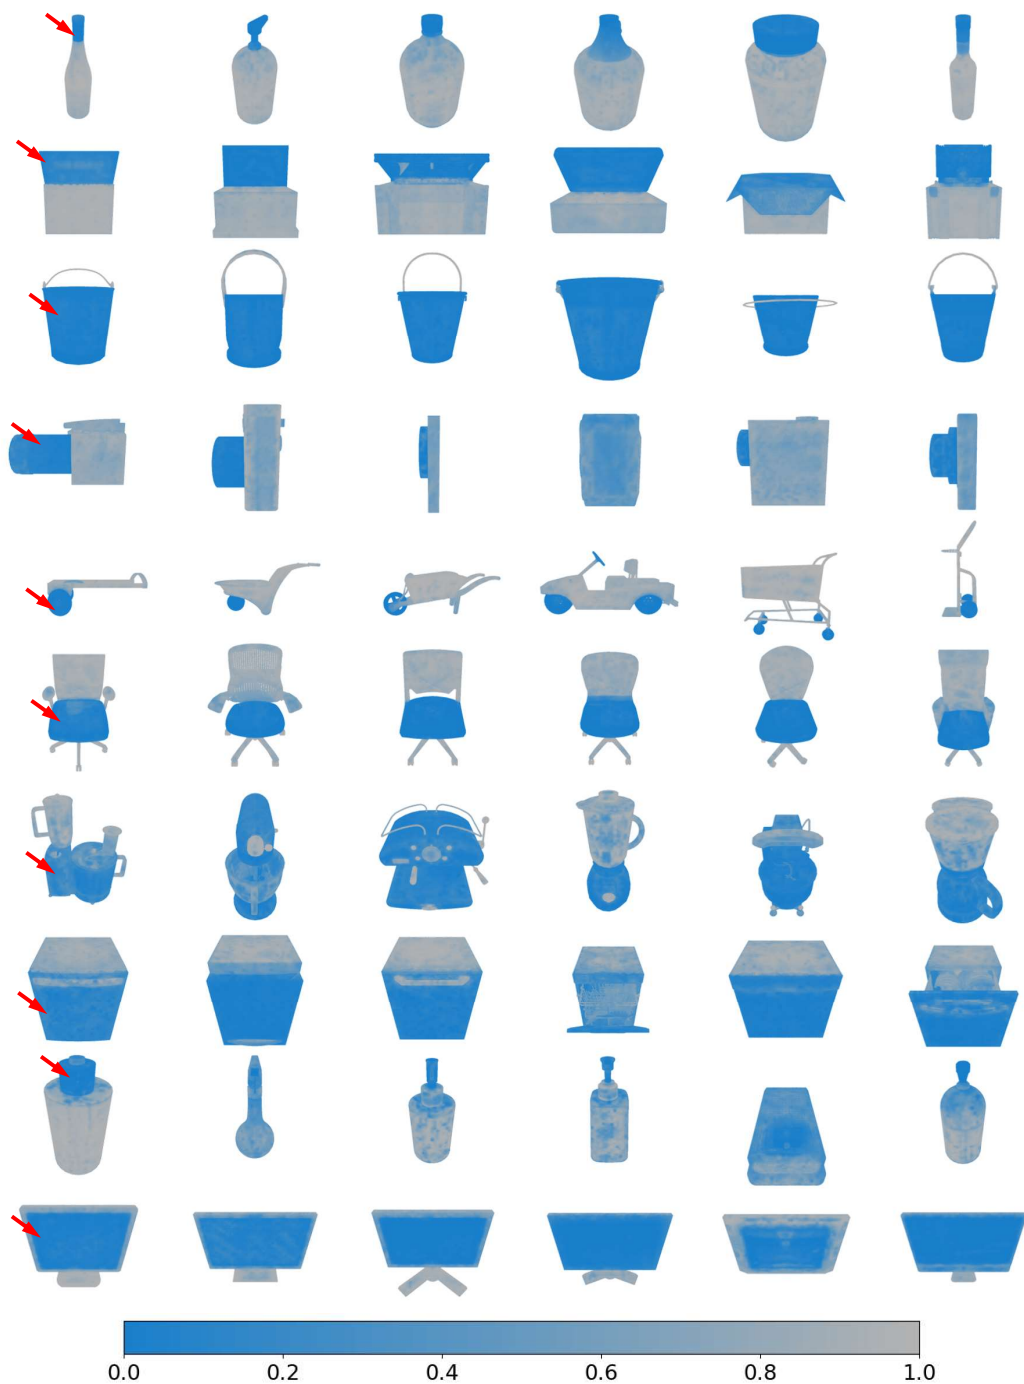

Figure A9: Feature similarities between an anchor point (indicated by red arrows) and points within the same shape (leftmost column) as well as points from different shapes (the five columns on the right). Color indicates the distance between features: smaller distances are shown in blue, while larger distances are shown in gray.

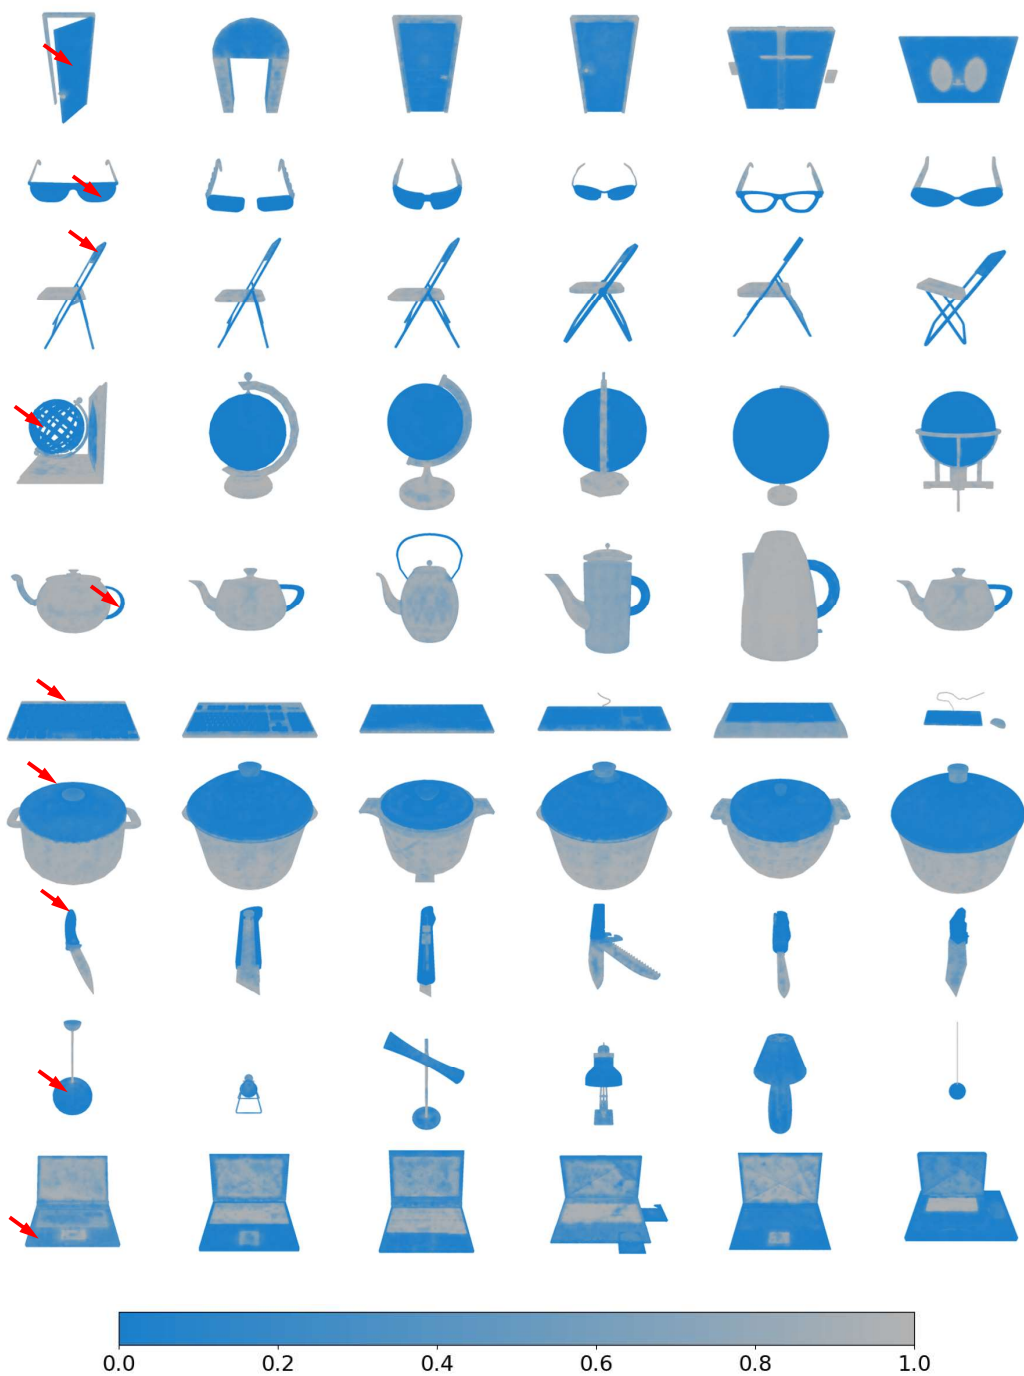

Figure A10: Feature similarities between anchor points and intra-/inter-shape points. See caption above for details.



Figure A11: Feature similarities between anchor points and intra-/inter-shape points. See caption above for details.

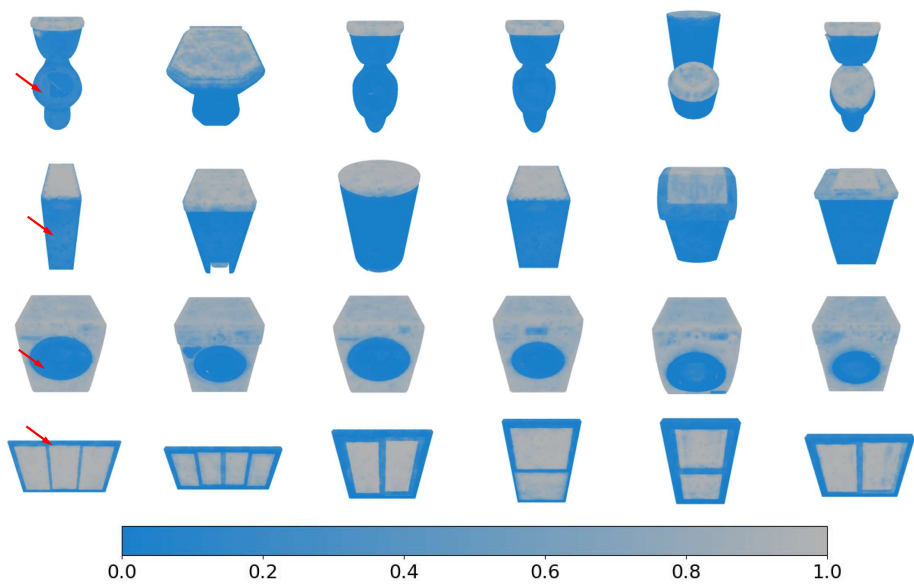

Figure A12: Feature similarities between anchor points and intra-/inter-shape points. See caption above for details.
